# Supplementary material for: Regulating the interfacial charge separation between MoS2QDs and sea-urchin graphitic carbon nitride for deep photodegradation of tetracycline under visible light
Source: Royal Society of Chemistry journal article supplement (doi:10.1039/d3nj00080j), 2023-01-01
Supplement: d3nj00080j1.pdf [file d3nj00080j1.pdf]

**Regulating the Interfacial Charge Separation between MoS<sub>2</sub> QDs and  
Sea-Urchin Graphitic Carbon Nitride for Deep Photodegradation of  
Tetracycline under Visible Light**

Xingyu Zhan, Hao Zhang, Yunxiong Zeng,<sup>\*</sup> Jingcai Xu, Ao Jin, Xingqin Wang, Jing Li,  
Yanting Yang, Bo Hong<sup>\*</sup>

College of Materials and Chemistry, Zhejiang Province Key Laboratory of Magnetic  
Materials, China Jiliang University, Hangzhou 310018, People's Republic of China

Corresponding author: Assist. Prof. Yunxiong Zeng

College of Materials and Chemistry, Zhejiang Province Key Laboratory of Magnetic  
Materials, China Jiliang University, Hangzhou 310018, People's Republic of China

Tel: +86-571-86835781

Email address: yxzeng@cjlu.edu.cn

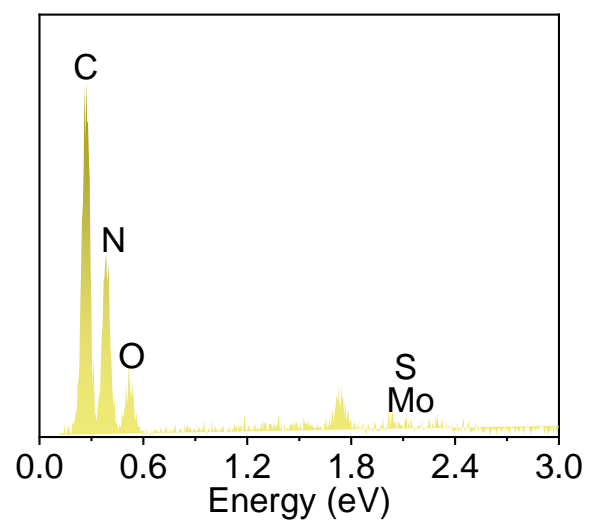

Fig. S1 EDS result of 5%MSUCN.

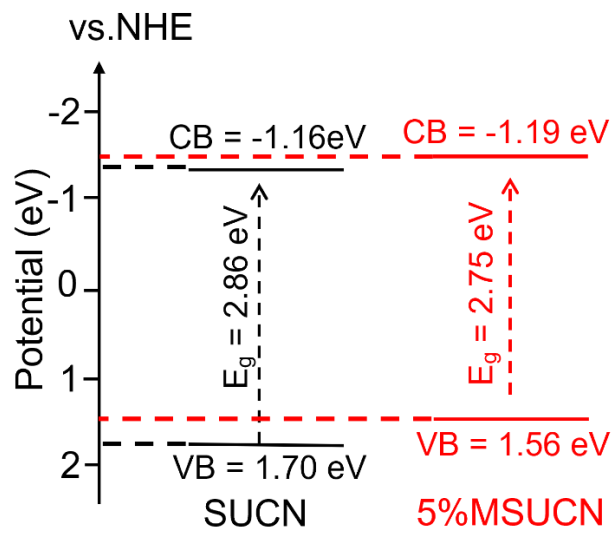

Fig. S2 The energy level distribution of SUCN and 5%MSUCN.

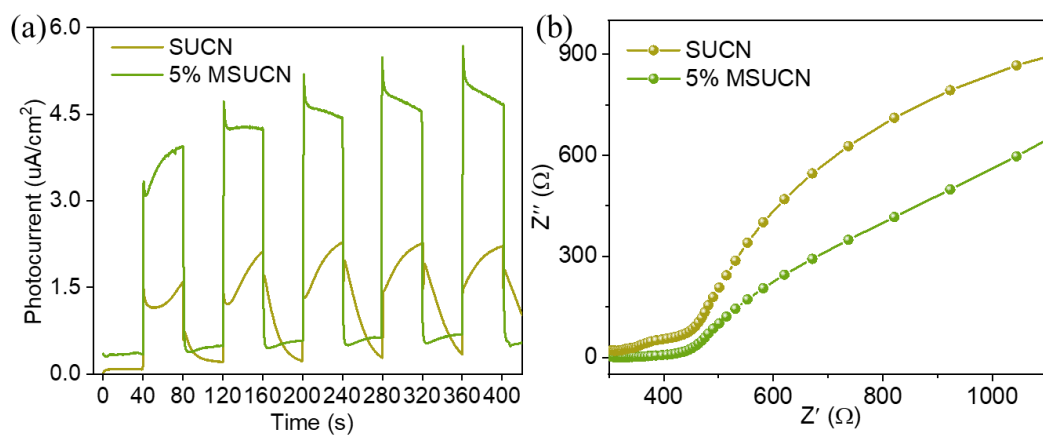

Fig. S3 (a) Transit photocurrent as a function of time, (b) A.C. EIS plot of SUCN and 5% MSUCN.

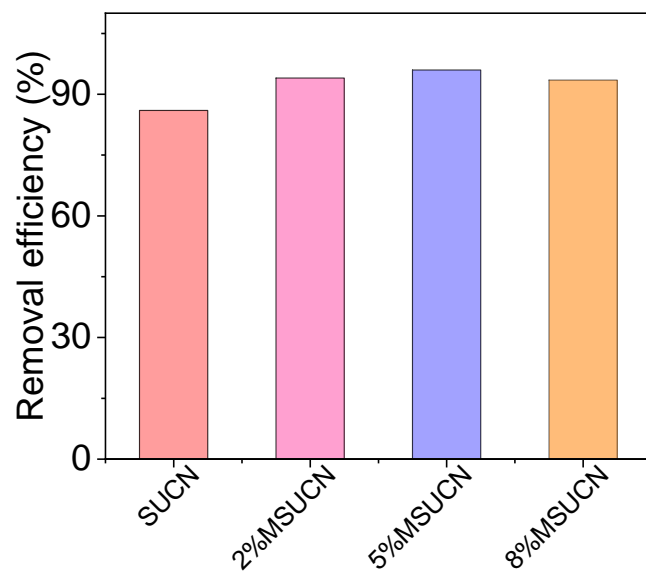

Fig. S4 Removal efficiency of TC over various samples under visible irradiation ( $\lambda \geq 400$  nm).

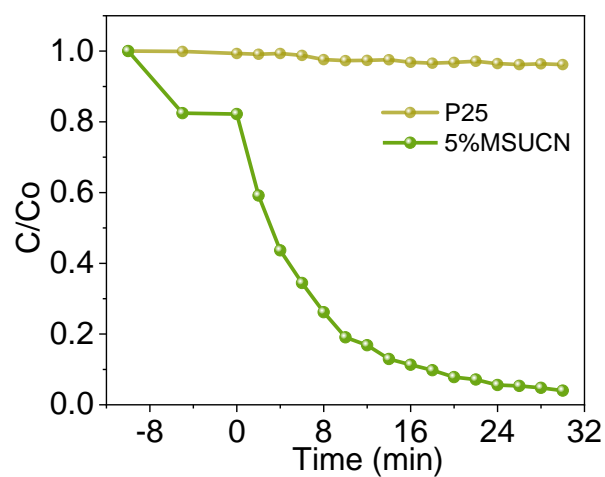

Fig. S5 Photodegradation of TC over P25 and 5%MSUCN under visible irradiation ( $\lambda \geq 400$  nm).

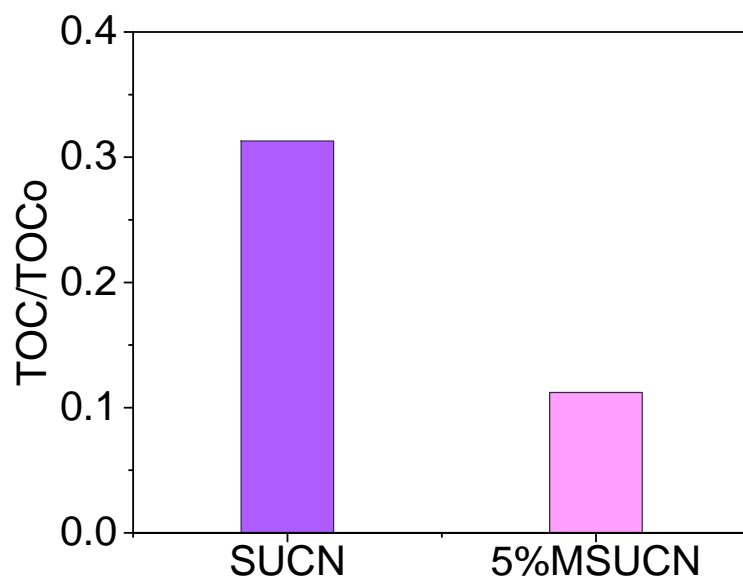

Fig. S6 TOC/TOCo ratio of residual suspension after SUCN and 5%MSUCN photodegradation, respectively.

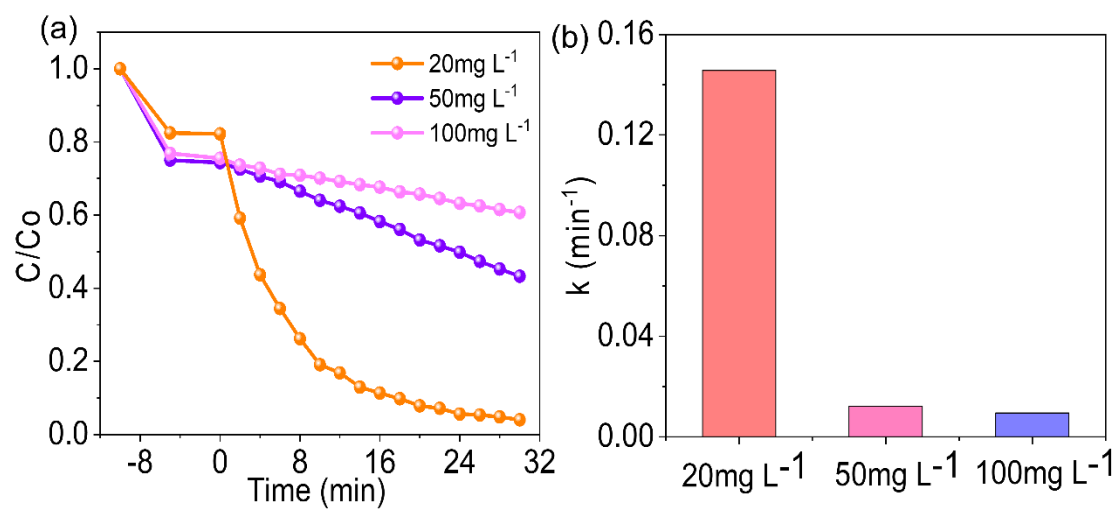

Fig. S7 (a) Degradation of TC with different initial concentrations, (b) pseudo-first-order kinetic constant.



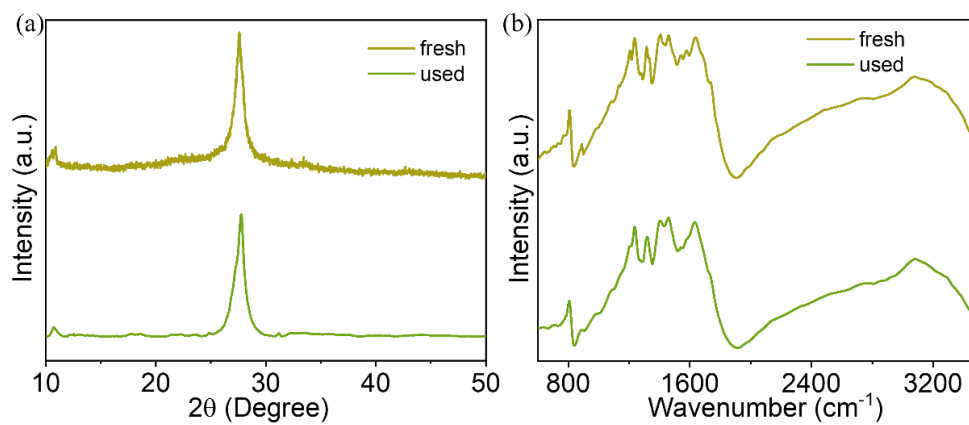

Fig. S8 (a) XRD and (b) FT-IR of used and fresh 5% MSUCN.

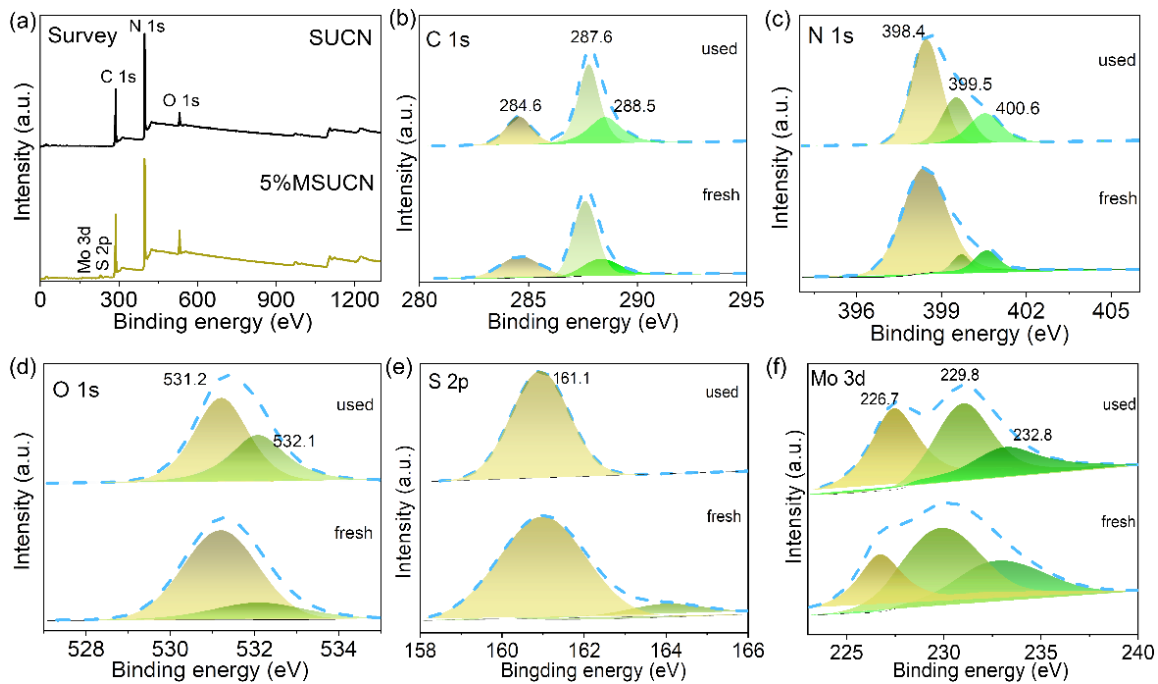

Fig. S9 (a) Full XPS, (b) C 1s, (c) N 1s, (d) O 1s, (e) S 2p and (f) Mo 3d XPS spectra of used and fresh 5% MSUCN.

Table S1 Comparison of different quantum dots (QDs)-modulated CN for TC removal under visible light.

| QDs                                | Light source                   | Time/min | k (min <sup>-1</sup> ) | Removal efficiency | Refs. |
|------------------------------------|--------------------------------|----------|------------------------|--------------------|-------|
| C QDs                              | 300W Xe ( $\lambda > 420$ nm)  | 60       | 0.0421                 | 100%               | 1     |
| WO <sub>3</sub> QDs                | 150W Xe ( $\lambda > 420$ nm)  | 180      | ~                      | 98%                | 2     |
| S-C QDs                            | 300 W Xe ( $\lambda > 420$ nm) | 40       | 0.0293                 | 79.0%              | 3     |
| Co <sub>3</sub> O <sub>4</sub> QDs | 300 W Xe ( $\lambda > 420$ nm) | 60       | ~                      | 97.3%              | 4     |
| BN/Ag QDs                          | 300 W Xe ( $\lambda > 420$ nm) | 60       | 0.0335                 | 80.5%              | 5     |
| BP QDs                             | 300 W Xe ( $\lambda > 420$ nm) | 60       | 0.0276                 | 81.1%              | 6     |
| CeO <sub>2</sub> /NC QDs           | 300 W Xe ( $\lambda > 420$ nm) | 60       | ~                      | 100%               | 7     |
| CeO <sub>2</sub> QDs               | 300 W Xe ( $\lambda > 420$ nm) | 180      | ~                      | 64.2%              | 8     |
| A-R QDs                            | 300 W Xe ( $\lambda > 420$ nm) | 120      | ~                      | 71.8%              | 9     |
| This work                          | 300 W Xe ( $\lambda > 400$ nm) | 30       | 0.145                  | 96.0%              |       |

## References

- 1 Q. Si, W. Guo, H. Wang, B. Liu, S. Zheng, Q. Zhao, H. Luo, N. Ren and T. Yu, *Applied Catalysis B: Environmental*, 2021, **299**, 120694.
- 2 J. Huang, B. Wang, Z. Hao, Z. Zhou and Y. Qu, *Chemical Engineering Journal*, 2021, **416**, 129109.
- 3 W. Wang, Z. Zeng, G. Zeng, C. Zhang, R. Xiao, C. Zhou, W. Xiong, Y. Yang, L. Lei, Y. Liu, D. Huang, M. Cheng, Y. Yang, Y. Fu, H. Luo and Y. Zhou, *Chemical Engineering Journal*, 2019, **378**, 122132.
- 4 S. Dai, L. Xiao, Q. Li, G. Hao, Y. Hu and W. Jiang, *Separation and Purification Technology*, 2022, **297**, 121481.
- 5 K. Ren, M. Lv, Q. Xie, C. Zhang and H. Shi, *Carbon*, 2022, **186**, 355–366.
- 6 W. Wang, Q. Niu, G. Zeng, C. Zhang, D. Huang, B. Shao, C. Zhou, Y. Yang, Y. Liu, H. Guo, W. Xiong, L. Lei, S. Liu, H. Yi, S. Chen and X. Tang, *Applied Catalysis B: Environmental*, 2020, **273**, 119051.
- 7 H. Qi, C. Shi, X. Jiang, M. Teng, Z. Sun, Z. Huang, D. Pan, S. Liu and Z. Guo, *Nanoscale*, 2020, **12**, 19112–19120.
- 8 Y. Sun, X. Yuan, Y. Wang, W. Zhang, Y. Li, Z. Zhang, J. Su, J. Zhang and S. Hu, *Applied Surface Science*, 2022, **576**, 151901.
- 9 X. Hu, Y. Yu, D. Chen, W. Xu, J. Fang, Z. Liu, R. Li, L. Yao, J. Qin and Z. Fang, *Chemical Engineering Journal*, 2022, **432**, 134375.
